# Supplementary material for: TRAF2 regulates TNF and NF-κB signalling to suppress apoptosis and skin inflammation independently of Sphingosine kinase 1
Source: eLife. 2015 Dec 23;4:e10592. doi: 10.7554/eLife.10592 (PMC4769158; doi:10.7554/eLife.10592)
Supplement: Figure 8—source data 2. — DOI: http://dx.doi.org/10.7554/eLife.10592.012 [file elife-10592-fig8-data2.xlsx]

## Sheet: Supplementary_qPCR_inflammation
Genes	logFC	AveExpr	P.Value	adj.P.Val
Csf2_Mm00438328_m1	11.9567	6.04733	0.0645952	0.42217
Il18rap_Mm00516053_m1	10.5719	5.30283	0.0447827	0.337874
Ctf1_Mm00432772_m1	9.07651	6.30617	0.0671493	0.42217
Olr1_Mm00454586_m1	8.0494	7.33583	0.0925261	0.459909
Vegfc_Mm00437310_m1	7.90599	6.95567	0.106769	0.482145
Il22ra2_Mm00617572_m1	7.78461	6.98183	0.0896029	0.454551
Tnfrsf1b_Mm00441889_m1	7.71047	7.637	0.0844567	0.454551
Csf2_Mm01290062_m1	7.64139	7.17167	0.122507	0.517912
Cx3cl1_Mm00436454_m1	7.29549	7.43633	0.112177	0.492413
Il23a_Mm01160011_g1	7.10916	10.1423	0.0360172	0.311104
Il18bp_Mm00456733_m1	6.26555	6.85883	0.154002	0.547924
Il23a_Mm00518984_m1	6.18137	11.3733	0.0369669	0.311104
Bcl10_Mm00784755_s1	6.16556	13.6073	0.202411	0.605441
Ccl5_Mm01302427_m1	5.6817	9.68483	0.0692895	0.42217
Abcf1_Mm01275245_m1	5.36697	13.349	0.217434	0.607601
Krt1_Mm00492992_g1	5.24336	13.6945	0.176693	0.580658
Ly75_Mm00522144_m1	5.22489	9.23433	0.126867	0.517912
Ccr9_Mm02620030_s1	4.86506	5.10233	0.390444	0.74693
Il6st_Mm00439665_m1	4.82207	14.1705	0.232776	0.607601
Csf3_Mm00438334_m1	4.70921	9.27433	0.139748	0.533067
Cntfr_Mm00516697_m1	4.3975	9.58717	0.191511	0.588462
Ptn_Mm00436062_m1	4.08672	6.09467	0.457797	0.807233
Cxcl9_Mm00434946_m1	4.06948	8.284	0.23392	0.607601
Hrh1_Mm00434002_s1	3.99328	5.19883	0.471984	0.808327
Hdac5_Mm00515941_g1	3.9278	5.891	0.475908	0.808327
F2r_Mm00438851_m1	3.87471	9.59783	0.239662	0.613681
Unc13d_Mm01252606_m1	3.80707	10.013	0.221678	0.607601
Il28ra_Mm00558035_m1	3.80225	10.2553	0.189818	0.588462
Sh2b2_Mm00517020_m1	3.78945	5.12433	0.494542	0.811609
Fabp4_Mm01295675_g1	3.73115	5.4365	0.498413	0.811609
Aox1_Mm00437475_m1	3.71842	5.45617	0.499156	0.811609
Ptgs1_Mm00477214_m1	3.4812	8.51367	0.27835	0.664109
Csf3_Mm00438335_g1	3.44703	5.65817	0.538746	0.818941
Tnfsf12;Tnfsf12-tnfsf13_Mm00839900_m1	3.42023	4.77467	0.540307	0.818941
Ccl28_Mm00445039_m1	3.40632	5.21283	0.537029	0.818941
Il17ra_Mm00434214_m1	3.2801	13.4985	0.114093	0.494402
C2_Mm00442726_m1	3.26782	4.785	0.56125	0.829946
Igfbp4_Mm00494922_m1	3.18277	5.56033	0.564756	0.829946
Il6ra_Mm00439653_m1	3.17405	9.30533	0.274425	0.664109
Tnfsf9_Mm00437155_m1	3.17055	8.29633	0.348875	0.714664
Gpr68_Mm00558545_s1	3.08377	4.76283	0.588117	0.844935
Pla2g7_Mm00479105_m1	2.97136	11.8928	0.0330537	0.311104
Pdgfb_Mm00440677_m1	2.38683	15.4647	0.000123096	0.0138688
Tgfb2_Mm00436955_m1	2.20573	14.3777	0.067718	0.42217
Ccl5_Mm01302428_m1	1.9382	11.726	0.0741076	0.424549
Fos_Mm00487426_g1	1.8987	11.6805	0.0757278	0.4266
Fos_Mm00487425_m1	1.87354	13.1555	0.00738777	0.156067
Fn1_Mm01256744_m1	1.68511	17.0612	2.33e-05	0.00786089
Socs2_Mm00850544_g1	1.6697	12.7577	0.0208536	0.26354
F2rl1_Mm00433160_m1	1.52701	17.176	0.000262821	0.0148056
Inhba_Mm00434339_m1	1.47455	17.8803	0.000180369	0.0148056
Il8rb_Mm00438258_m1	1.4676	10.7163	0.357063	0.718377
Il2rg_Mm00442885_m1	1.42787	12.8562	0.0377375	0.311104
Csf1_Mm00432686_m1	1.38731	17.1017	0.000604742	0.0255503
Tnc_Mm00495662_m1	1.38132	18.1828	0.00127016	0.0390287
Nmi_Mm00803857_m1	1.35536	13.972	0.022854	0.266367
Il1r1_Mm00434237_m1	1.34527	15.4352	0.0241885	0.272523
Fam3c_Mm00506835_m1	1.33402	17.8238	8.86e-05	0.0138688
Il23r_Mm00519943_m1	1.3154	6.86333	0.784109	0.939819
Cd97_Mm00516248_m1	1.257	12.2417	0.111649	0.492413
Tlr3_Mm00628112_m1	1.23504	13.6128	0.0533372	0.367918
Cxcl12_Mm00445553_m1	1.21387	13.784	0.0710079	0.42217
Il4ra_Mm00439634_m1	1.21212	15.7697	0.00467111	0.112774
Tfrc_Mm00441941_m1	1.14882	14.5903	0.0156507	0.239058
Erap1_Mm00472842_m1	1.13513	15.4815	0.0123934	0.215492
Apoe_Mm00437573_m1	1.12464	16.304	0.0901032	0.454551
Cmtm3_Mm00470315_m1	1.12458	13.6958	0.0858883	0.454551
Hdac4_Mm01299565_m1	1.11587	14.3967	0.0367982	0.311104
Cd44_Mm01277163_m1	1.00392	19.6985	0.000384426	0.0185623
Itgb6_Mm01269869_m1	0.991747	17.4825	0.00174285	0.0490903
B2m_Mm00437762_m1	0.98392	20.6292	0.000863337	0.0324231
Bmp2_Mm01340178_m1	0.976936	11.8687	0.281713	0.664109
Irf7_Mm00516788_m1	0.968004	11.885	0.361848	0.720116
Eda2r_Mm00723601_m1	0.959845	13.2188	0.123771	0.517912
Areg_Mm00437583_m1	0.945535	12.065	0.26854	0.660307
Atrn_Mm00437746_m1	0.944059	14.968	0.0347196	0.311104
Tlr5_Mm00546288_s1	0.906726	13.2087	0.209144	0.607601
Ifih1_Mm00459183_m1	0.893424	15.7678	0.0123279	0.215492
Tgfbr1_Mm00436964_m1	0.871667	14.1472	0.0702612	0.42217
Tnfaip3_Mm00437121_m1	0.864623	14.7282	0.0883072	0.454551
Aimp1_Mm00433034_m1	0.826084	16.976	0.151815	0.547924
Acvr1_Mm01331069_m1	0.824836	16.0165	0.0118888	0.215492
Lifr_Mm00442942_m1	0.816067	12.382	0.36645	0.720116
Egfr_Mm00433023_m1	0.81115	16.6285	0.0218317	0.26354
Tirap_Mm00446502_m1	0.802305	13.751	0.176813	0.580658
Il1rn_Mm01337566_m1	0.78271	15.688	0.0592289	0.400387
Vps45_Mm00496940_m1	0.778149	13.663	0.191418	0.588462
Ifngr2_Mm00492626_m1	0.75246	16.33	0.0508193	0.365467
S100a8_Mm00496696_g1	0.740576	18.5198	0.179965	0.584888
Clu_Mm00442773_m1	0.716578	17.7893	0.0733196	0.424549
Casp1_Mm00438023_m1	0.700703	14.8285	0.286864	0.664109
Cr1l_Mm00785297_s1	0.692075	16.1862	0.0319389	0.311104
F3_Mm00438853_m1	0.674205	16.8143	0.0711944	0.42217
Ccl6_Mm01302419_m1	0.61416	12.9255	0.562404	0.829946
Cebpb_Mm00843434_s1	0.588857	13.8262	0.269593	0.660307
Bmp1_Mm00802225_m1	0.580048	15.6718	0.227072	0.607601
Tnfrsf18_Mm00437136_m1	0.570099	12.7578	0.422913	0.781117
Actb_Mm00607939_s1	0.566516	22.86	0.000237623	0.0148056
S100a8_Mm01220132_g1	0.562806	19.4237	0.369051	0.721036
Il22ra1_Mm00663697_m1	0.559864	12.4823	0.447916	0.796819
Spred2_Mm00835803_g1	0.557272	13.1917	0.431842	0.788988
Il1rap_Mm00492638_m1	0.55198	14.1203	0.340118	0.709629
Cd80_Mm00711660_m1	0.525103	12.5738	0.529298	0.818941
Cxcl16_Mm00469712_m1	0.524749	18.0108	0.0264612	0.288513
Tbp_Mm00446973_m1	0.503321	14.4452	0.28502	0.664109
Tlr4_Mm00445273_m1	0.502506	15.5337	0.250675	0.632521
Il33_Mm00505403_m1	0.498288	16.2648	0.597544	0.844935
Hpse_Mm00461768_m1	0.486751	7.6455	0.91563	0.982485
Ereg_Mm00514794_m1	0.479715	12.485	0.611157	0.851145
Rela_Mm00501346_m1	0.473302	15.3308	0.19463	0.592658
Gusb_Mm00446953_m1	0.464553	14.8927	0.229113	0.607601
Il1rl2_Mm00519250_m1	0.462951	14.8493	0.468155	0.808327
Cdkn1a_Mm00432448_m1	0.461277	18.8435	0.0403598	0.3248
Tollip_Mm00445841_m1	0.457186	17.1362	0.12718	0.517912
Il15ra_Mm00500457_m1	0.432964	13.0622	0.540032	0.818941
Mapkapk2_Mm01288465_m1	0.430377	16.1965	0.140364	0.533067
Klf6_Mm00516184_m1	0.419758	17.1642	0.0855004	0.454551
Stat5b_Mm00839889_m1	0.416755	13.223	0.458547	0.807233
Tslp_Mm00498739_m1	0.413721	12.7867	0.672855	0.887535
Ccrl1_Mm02620636_s1	0.411462	6.82567	0.93035	0.986121
Cd55_Mm00438377_m1	0.398158	15.074	0.348229	0.714664
Polr2a_Mm00839493_m1	0.391607	15.5118	0.295899	0.671235
Tgfbr1_Mm03024015_m1	0.391586	15.5273	0.293513	0.670321
Pxdn_Mm00625468_m1	0.391386	15.3077	0.317771	0.692946
Adrb2_Mm02524224_s1	0.389547	15.1132	0.402152	0.759371
Nfatc3_Mm01249200_m1	0.384243	9.8115	0.953327	0.987014
Ifngr1_Mm00599890_m1	0.37774	16.3245	0.217561	0.607601
Prdx5_Mm00465365_m1	0.370649	17.9853	0.153185	0.547924
Nfe2l1_Mm00599712_m1	0.368404	19.1733	0.136264	0.533067
Afap1l2_Mm00525039_m1	0.367234	13.8832	0.493484	0.811609
Socs1_Mm00782550_s1	0.358642	11.2605	0.684949	0.88928
Ptpn6_Mm00469153_m1	0.357977	13.9017	0.472285	0.808327
Egfr_Mm01187858_m1	0.356387	15.8312	0.254489	0.637166
Cav1_Mm00483057_m1	0.355348	19.5927	0.0976886	0.478533
Map2k3_Mm00435950_m1	0.354704	15.3883	0.327579	0.69521
Inha_Mm00439683_m1	0.346072	11.013	0.734031	0.925756
Cxcl10_Mm00445235_m1	0.340695	8.41683	0.942128	0.987014
Hdac5_Mm01246076_m1	0.33981	13.899	0.490313	0.811609
Nfrkb_Mm00555264_m1	0.338931	13.4535	0.533083	0.818941
Cklf_Mm00459364_m1	0.335335	13.197	0.570793	0.835187
Rhoa_Mm01601614_g1	0.333519	18.841	0.0991864	0.478929
Gapdh_Mm99999915_g1	0.330488	21.8672	0.0168823	0.239058
Nup85_Mm01243354_m1	0.32412	13.2435	0.597419	0.844935
Axl_Mm00437221_m1	0.320063	18.4938	0.153319	0.547924
Jak2_Mm01208489_m1	0.311521	14.4422	0.44781	0.796819
Ndst1_Mm00447005_m1	0.309468	15.087	0.416813	0.774489
Mmp25_Mm01309189_m1	0.296045	7.9135	0.947871	0.987014
Vegfa_Mm01281449_m1	0.295516	13.6975	0.666445	0.883366
Cmtm6_Mm00509048_m1	0.293727	16.3983	0.299182	0.674157
Glmn_Mm00504709_m1	0.285247	11.9087	0.774822	0.939284
5730403B10Rik_Mm00481784_m1	0.284878	13.7103	0.561974	0.829946
Bmp7_Mm00432101_m1	0.260342	15.0497	0.510377	0.813714
Krt7_Mm00466676_m1	0.258941	16.9458	0.320743	0.694944
Nod1_Mm00805062_m1	0.251939	11.2697	0.806964	0.951932
Erbb2_Mm00658541_m1	0.249481	13.3072	0.651743	0.879045
Trp53_Mm01731287_m1	0.234092	15.7307	0.475325	0.808327
B4galt1_Mm00480752_m1	0.23259	17.2617	0.35174	0.716193
Ddx58_Mm00554529_m1	0.228077	15.5103	0.496366	0.811609
Ltbr_Mm00440235_m1	0.223386	14.5455	0.614436	0.851145
Cd24a_Mm00782538_sH	0.200827	19.1943	0.436008	0.789482
Malt1_Mm00555961_m1	0.196513	13.4923	0.73213	0.925756
S100a9_Mm00656925_m1	0.188193	18.0427	0.79148	0.945302
Ripk2_Mm00446816_m1	0.186784	15.2435	0.640369	0.876294
Pycard_Mm00445747_g1	0.185285	15.7532	0.612011	0.851145
F11r_Mm00554113_m1	0.185019	18.0508	0.417033	0.774489
Tnfrsf1a_Mm01182929_m1	0.181494	15.7158	0.582006	0.840675
S1pr3_Mm04229896_m1	0.179647	10.762	0.866094	0.964848
Lif_Mm00434762_g1	0.171134	12.5203	0.81715	0.952587
Inhbb_Mm01286587_m1	0.163486	13.6752	0.773765	0.939284
Vegfb_Mm00442102_m1	0.15909	12.5913	0.808297	0.951932
Plaa_Mm00554584_m1	0.158614	16.951	0.536198	0.818941
Orm1_Mm00435456_g1	0.15682	17.1488	0.547733	0.822816
Grn_Mm00433848_m1	0.153738	17.8522	0.544329	0.821354
Tnfrsf1a_Mm00441875_m1	0.14735	15.2372	0.703563	0.90765
Il18_Mm00434225_m1	0.145729	15.0743	0.872668	0.964848
Gpx1_Mm00656767_g1	0.141357	19.867	0.429252	0.788517
Txlna_Mm01185793_m1	0.14057	15.6713	0.650021	0.879045
Tgfb1_Mm01178820_m1	0.136362	14.3213	0.774048	0.939284
Tnfrsf4_Mm00442039_m1	0.120366	14.7713	0.778105	0.939284
Akt1_Mm01331626_m1	0.116437	16.1847	0.665543	0.883366
Mgll_Mm00449274_m1	0.101693	7.01667	0.983158	0.993989
Ywhaz_Mm01158417_g1	0.0986916	18.4737	0.652497	0.879045
Jun_Mm00495062_s1	0.0895227	16.9213	0.728748	0.925756
Rac1_Mm01201657_g1	0.0881278	18.3212	0.686692	0.88928
Jak1_Mm00600614_m1	0.0861107	16.8988	0.718491	0.919886
Siva1_Mm00834449_g1	0.0821672	14.2043	0.854055	0.964848
Il10rb_Mm00434157_m1	0.0806107	15.9712	0.821395	0.954061
Ubc_Mm01201237_m1	0.0767415	19.3373	0.656383	0.880387
Mapk8_Mm00489514_m1	0.0690674	14.1022	0.87292	0.964848
Ptgs2_Mm00478374_m1	0.0686558	15.7858	0.858908	0.964848
Gsk3b_Mm00444911_m1	0.0667399	15.9008	0.812862	0.952587
Stat1_Mm00439531_m1	0.0611179	15.1137	0.8964	0.974222
Bmp7_Mm00432102_m1	0.0535471	14.2258	0.896042	0.974222
Hsp90ab1_Mm00833431_g1	0.051018	19.3027	0.777204	0.939284
Cmtm7_Mm00506011_m1	0.0505076	13.6857	0.930688	0.986121
Gusb_Mm01197698_m1	0.0504796	14.2307	0.926965	0.986121
Irak2_Mm00549143_m1	0.0487459	13.0438	0.936516	0.987014
Irak1_Mm00434254_m1	0.0423436	14.1875	0.924038	0.986121
Rhoa_Mm01228062_g1	0.0341821	19.5762	0.843695	0.964848
Bad_Mm00432042_m1	0.0248402	14.2953	0.960698	0.989144
Procr_Mm00440992_m1	0.0242634	15.0517	0.954892	0.987014
Ncam1_Mm01149710_m1	0.0236669	14.3942	0.979638	0.993989
Tnfrsf11b_Mm01205928_m1	0.0212042	16.1587	0.946848	0.987014
Cmtm4_Mm00463816_m1	0.019906	13.1197	0.97358	0.991175
Nr3c1_Mm00433832_m1	-0.00386094	14.988	0.99285	0.993989
Lta4h_Mm00521826_m1	-0.00496001	16.0557	0.987702	0.993989
Bmpr1b_Mm00432117_m1	-0.00748357	11.3983	0.993989	0.993989
Nono_Mm00834875_g1	-0.0102934	18.3037	0.967172	0.990618
Irf3_Mm01203177_m1	-0.0196249	15.586	0.952233	0.987014
C1s_Mm00663210_mH	-0.0206079	12.7355	0.989012	0.993989
Aimp1_Mm01320868_m1	-0.0230229	15.3542	0.943755	0.987014
Pgk1_Mm00435617_m1	-0.0353104	18.6455	0.873178	0.964848
Plp2_Mm02342686_g1	-0.0415324	18.1555	0.86851	0.964848
Myd88_Mm00440338_m1	-0.0434775	15.1088	0.91505	0.982485
Il13ra1_Mm01302068_m1	-0.0459086	17.359	0.865354	0.964848
Rhoa_Mm00834507_g1	-0.0592673	19.3813	0.772638	0.939284
Ifnar1_Mm00439544_m1	-0.0619766	15.3628	0.869641	0.964848
Hdac4_Mm01299557_m1	-0.0647409	14.0823	0.889658	0.973154
Zfp36_Mm00457144_m1	-0.0667665	16.7305	0.80418	0.951932
Blnk_Mm01197846_m1	-0.0853161	13.2713	0.879211	0.964848
Il28ra_Mm01192973_m1	-0.0906375	11.8093	0.914959	0.982485
Anxa1_Mm00440225_m1	-0.0965176	22.858	0.599248	0.844935
Il15_Mm00434210_m1	-0.0972136	11.4898	0.912916	0.982485
Hprt1_Mm01318743_m1	-0.0977415	16.9047	0.683535	0.88928
Hprt1_Mm00446968_m1	-0.0983256	16.6788	0.708671	0.910764
Irf3_Mm00516779_m1	-0.118289	14.6197	0.783196	0.939819
Ppia;E030024N20Rik_Mm03024003_g1	-0.122028	21.1208	0.406648	0.763595
Ppia_Mm02342429_g1	-0.131663	22.3617	0.32303	0.69521
Sdcbp_Mm00489742_m1	-0.142807	17.7082	0.550603	0.823468
Ccl2_Mm00441242_m1	-0.147579	14.02	0.878214	0.964848
Stat3_Mm01219775_m1	-0.158099	15.9912	0.58018	0.840675
Clcf1_Mm00480200_m1	-0.165228	7.05333	0.972326	0.991175
Il1f5_Mm00497802_m1	-0.168165	14.7335	0.674842	0.887535
Rbm4_Mm01227862_m1	-0.190368	12.2988	0.79829	0.950078
Il13ra1_Mm00446726_m1	-0.19718	15.8003	0.522172	0.818941
Stat6_Mm01160477_m1	-0.20461	15.692	0.536794	0.818941
Flt3l_Mm00442801_m1	-0.208387	10.8692	0.833573	0.961596
Ccl25_Mm00436443_m1	-0.208875	8.38333	0.962806	0.989144
Hprt1_Mm01324427_m1	-0.210889	16.5177	0.463928	0.808327
Lyn_Mm01217488_m1	-0.21093	13.284	0.753343	0.929307
Ptges_Mm00452105_m1	-0.21126	14.8985	0.661318	0.883366
Icosl_Mm00497237_m1	-0.211958	13.024	0.724952	0.924656
Pxmp2_Mm00477269_m1	-0.215919	13.0117	0.74765	0.929065
Trip6_Mm00600041_m1	-0.218876	14.2512	0.640303	0.876294
Acvrl1_Mm00437432_m1	-0.232463	13.2127	0.745478	0.929065
Spred1_Mm00473782_m1	-0.245014	14.8692	0.596191	0.844935
Pten_Mm00477208_m1	-0.248888	17.6368	0.326173	0.69521
Ppia_Mm02342430_g1	-0.257994	20.9145	0.106985	0.482145
P2rx7_Mm00440578_m1	-0.263641	11.6592	0.741754	0.929065
Bmp7_Mm00432105_m1	-0.266827	14.4132	0.62945	0.868384
Gpx4_Mm00515041_m1	-0.287483	15.7367	0.355885	0.718377
Csf2ra_Mm00438331_g1	-0.305794	11.0498	0.744491	0.929065
Hprt1_Mm01318747_g1	-0.307463	17.4643	0.219018	0.607601
H47_Mm00502826_m1	-0.307996	16.2447	0.281298	0.664109
Gusb_Mm03003537_s1	-0.308325	14.3052	0.478819	0.809204
Hdac7_Mm00469527_m1	-0.309136	14.4903	0.442574	0.795692
Irak4_Mm00459443_m1	-0.339384	14.354	0.506797	0.81288
Lefty1;Lefty2_Mm03024199_gH	-0.340554	10.8005	0.751632	0.929307
Hmbs_Mm00660262_g1	-0.37598	14.5788	0.365254	0.720116
Hmgb1_Mm00849805_gH	-0.393346	15.369	0.305632	0.679229
Ik_Mm00803668_m1	-0.402072	16.7147	0.106753	0.482145
Nfkb1_Mm00476361_m1	-0.404862	16.0375	0.22835	0.607601
Hdac5_Mm00515917_m1	-0.410651	13.0743	0.499452	0.811609
Timm50_Mm00508510_m1	-0.413167	14.8367	0.283744	0.664109
Ifnar2_Mm00494916_m1	-0.41397	16.3238	0.153348	0.547924
Bcl6_Mm00477633_m1	-0.417005	15.3463	0.214141	0.607601
Hspd1_Mm00849835_g1	-0.419985	13.6722	0.436785	0.789482
Irak3_Mm00518541_m1	-0.420448	14.1187	0.374779	0.728018
Cd14_Mm00438094_g1	-0.429508	9.809	0.829119	0.959734
Cxcl1_Mm04207460_m1	-0.447175	15.758	0.185454	0.588462
Hdac4_Mm01299543_m1	-0.451185	13.4223	0.391144	0.74693
Sod1_Mm01344232_g1	-0.458402	15.4175	0.170779	0.580559
Ltbp4_Mm00723631_m1	-0.502541	12.9112	0.504078	0.81288
Hdac7_Mm00469520_m1	-0.525723	15.7682	0.102608	0.482145
Dnajc8_Mm00552449_m1	-0.537945	17.3277	0.0431537	0.337874
Spp1_Mm00436767_m1	-0.608453	12.4283	0.599954	0.844935
Cmtm8_Mm00510311_m1	-0.612927	13.2347	0.307462	0.679229
Lifr_Mm00442940_m1	-0.630961	12.1208	0.490591	0.811609
Lrp8_Mm00474028_m1	-0.64471	13.3845	0.310421	0.681313
Nfx1_Mm00458401_m1	-0.664928	13.3598	0.291977	0.670321
Pik3r1_Mm00803160_m1	-0.711235	16.0412	0.0524968	0.367918
Ipo8_Mm01255158_m1	-0.740271	14.1613	0.13689	0.533067
Cd274_Mm00452054_m1	-0.753373	7.02567	0.875071	0.964848
Il1a_Mm00439620_m1	-0.77075	14.06	0.168654	0.580559
Cdo1_Mm00473573_m1	-0.775847	7.73133	0.867991	0.964848
Tgm2_Mm00436987_m1	-0.776467	11.976	0.507448	0.81288
Sod1_Mm01700393_g1	-0.777869	16.1143	0.0169745	0.239058
Bre_Mm00513816_m1	-0.817906	15.1847	0.0282546	0.298439
Tpst1_Mm00496931_m1	-0.825955	12.6008	0.382258	0.738303
Ephx2_Mm00514706_m1	-0.832278	10.785	0.475494	0.808327
Kitl_Mm00442972_m1	-0.866892	12.1817	0.362339	0.720116
Il24_Mm00474102_m1	-0.878161	11.9293	0.301228	0.674272
Hif1a_Mm01283760_m1	-0.931082	19.0167	0.000962522	0.0325332
Nod2_Mm00467543_m1	-0.934699	14.4527	0.0470527	0.345735
Tlr2_Mm00442346_m1	-0.935502	15.1913	0.0370878	0.311104
Jak3_Mm00439962_m1	-0.974949	7.16867	0.842089	0.964848
Cxcl1_Mm00433859_m1	-1.02269	15.6572	0.0200779	0.26354
Lep_Mm00434759_m1	-1.12654	6.94567	0.817308	0.952587
Fas_Mm00433237_m1	-1.1394	13.3828	0.0888165	0.454551
Cxcl14_Mm00444699_m1	-1.22378	16.1795	0.00416887	0.108391
Fam3b_Mm00508056_m1	-1.24878	11.5548	0.230471	0.607601
Ccl20_Mm01268754_m1	-1.25746	13.7003	0.034172	0.311104
Ccl7_Mm00443113_m1	-1.41654	11.8177	0.171763	0.580559
C3_Mm00437858_m1	-1.4504	12.9993	0.0449832	0.337874
Figf_Mm01131929_m1	-1.48906	13.6347	0.012751	0.215492
Ltbp4_Mm00723639_g1	-1.95336	12.4233	0.0150939	0.239058
Rcan1_Mm00627762_m1	-2.09012	13.205	0.00572212	0.128938
Gdf11_Mm01159973_m1	-2.47915	5.24167	0.679391	0.88928
Ccrl2_Mm00516914_g1	-2.75952	4.886	0.652782	0.879045
Slurp1_Mm00445117_m1	-3.06495	10.262	0.333624	0.700403
Tnfsf13;Tnfsf12-tnfsf13_Mm00840215_g1	-3.20218	4.93567	0.613081	0.851145
Ccl7_Mm01308393_g1	-3.37463	10.299	0.329093	0.69521
Cxcr6_Mm02620517_s1	-3.49709	5.33367	0.573588	0.835658
Cebpa_Mm00514283_s1	-3.68437	12.7532	0.39782	0.75541
Bmp6_Mm01332882_m1	-3.7972	8.75083	0.34824	0.714664
Il3ra_Mm00434273_m1	-3.80806	10.4933	0.212905	0.607601
Ltf_Mm00434787_m1	-4.15673	5.362	0.528199	0.818941
Cdk5_Mm01164910_m1	-4.22153	6.4795	0.526903	0.818941
Map2k6_Mm00803694_m1	-4.31358	9.10483	0.225406	0.607601
Cxcl5_Mm00436451_g1	-4.38349	9.70767	0.224331	0.607601
Cyp26b1_Mm00558507_m1	-4.58205	9.716	0.176946	0.580658
Saa1_Mm00656927_g1	-4.82351	11.7785	0.02162	0.26354
Casp8_Mm00802247_m1	-4.84305	13.1053	0.250763	0.632521
Cxcl2_Mm00436450_m1	-4.87891	8.63283	0.189639	0.588462
Mapk14_Mm00442497_m1	-5.0156	12.7253	0.168742	0.580559
Il1f9_Mm00463327_m1	-5.25019	13.8095	0.234374	0.607601
Gdf15_Mm00442228_m1	-5.42997	6.993	0.280313	0.664109
Il1f6_Mm00457645_m1	-5.49176	10.297	0.129882	0.522621
Hmox1_Mm00516005_m1	-5.56453	14.26	0.23549	0.607601
Acvr2b_Mm00431664_m1	-6.15147	7.10067	0.227617	0.607601
Nfam1_Mm00546934_m1	-6.24786	6.24067	0.257908	0.640976
Pglyrp1_Mm00437150_m1	-7.1746	6.45317	0.187487	0.588462
Saa3_Mm00441203_m1	-7.39648	10.3037	0.198367	0.598644
Fabp4_Mm00445878_m1	-7.73276	7.86883	0.126975	0.517912
Bmp6_Mm00432095_m1	-7.90564	6.99317	0.162846	0.573353
Wnt16_Mm00446420_m1	-9.13429	8.454	0.138417	0.533067
Krt8_Mm00835759_m1	-10.1905	10.4955	0.145919	0.547924
Il17rb_Mm00444704_m1	-11.1173	5.54133	0.104567	0.482145
